# Supplementary material for: Synthesis and non-linear optical characterization of novel borinate derivatives of cinnamaldehyde
Source: Royal Society of Chemistry journal article supplement (doi:10.1039/b820435g), 2009-01-01
Supplement: b820435g.pdf [file b820435g.pdf]

Atomic coordinates (in Å), as calculated by DFT, for the 6 derivatives investigated in the manuscript:

"Synthesis and non linear optical characterization of novel boronate derivatives of cinnamaldehyde"

By **Mario Rodríguez** *et al.*

### Compound 1a

|   |          |          |          |
|---|----------|----------|----------|
| O | 6.87825  | 3.47661  | -7.85947 |
| H | 6.61783  | 4.42255  | -7.79998 |
| N | 7.96945  | 5.79184  | -7.29078 |
| C | 8.89782  | 2.27288  | -7.52222 |
| C | 8.82482  | 4.69749  | -7.22413 |
| C | 7.72255  | 9.37213  | -6.88424 |
| C | 6.85286  | 10.53848 | -6.94500 |
| C | 10.18995 | 4.68282  | -6.89209 |
| C | 8.18286  | 3.47245  | -7.54083 |
| C | 8.33097  | 7.00420  | -7.04415 |
| C | 7.38505  | 8.08551  | -7.13467 |
| C | 7.39520  | 11.80357 | -6.64733 |
| C | 10.24606 | 2.28860  | -7.19034 |
| H | 10.80223 | 1.35485  | -7.17596 |
| C | 10.89618 | 3.48943  | -6.87483 |
| C | 5.48776  | 10.46558 | -7.28858 |
| C | 6.61867  | 12.95217 | -6.68761 |
| C | 5.27560  | 12.83674 | -7.03136 |
| C | 4.69983  | 11.60340 | -7.33307 |
| H | 6.37425  | 7.80192  | -7.41911 |
| H | 8.38165  | 1.35027  | -7.76872 |
| H | 5.03587  | 9.50721  | -7.52411 |
| H | 9.35768  | 7.26815  | -6.75838 |
| H | 11.95132 | 3.48665  | -6.61707 |
| H | 8.75605  | 9.57927  | -6.60423 |
| H | 8.44618  | 11.88069 | -6.38007 |
| H | 10.70026 | 5.61053  | -6.64640 |
| H | 7.03046  | 13.92838 | -6.45955 |
| H | 3.64945  | 11.55716 | -7.59617 |
| N | 4.44562  | 14.04065 | -7.07751 |
| O | 3.26622  | 13.90575 | -7.38384 |
| O | 4.98050  | 15.11012 | -6.80707 |

### Compound 2a

|   |          |          |          |
|---|----------|----------|----------|
| O | -3.71621 | 0.47064  | 0.59721  |
| N | -1.99892 | -1.04025 | -0.12601 |
| C | -5.56789 | -1.06185 | 0.32726  |
| C | -3.25964 | -1.64025 | -0.18258 |

|   |          |          |          |
|---|----------|----------|----------|
| C | 1.53962  | -1.79225 | -0.49542 |
| C | 2.90951  | -1.31829 | -0.39490 |
| C | -3.62708 | -2.93436 | -0.56230 |
| C | -1.39497 | 0.94513  | 1.57198  |
| C | -4.21534 | -0.70040 | 0.26026  |
| C | -0.87723 | -1.66999 | -0.35219 |
| C | -0.44478 | 1.97794  | 1.56831  |
| C | 0.41408  | -1.07459 | -0.24619 |
| C | -1.59398 | 0.26372  | 2.78420  |
| C | 3.94991  | -2.15869 | -0.83725 |
| C | -5.92384 | -2.34846 | -0.05080 |
| H | -6.96930 | -2.64285 | -0.00692 |
| C | -1.43172 | 1.07484  | -2.24513 |
| C | -2.04690 | 1.46468  | -1.04903 |
| C | 0.28165  | 2.30989  | 2.71408  |
| C | -4.96881 | -3.28151 | -0.49462 |
| C | -2.55205 | 2.77643  | -0.98960 |
| B | -2.24350 | 0.53423  | 0.25974  |
| C | -0.87482 | 0.58516  | 3.93319  |
| C | 3.24704  | -0.05530 | 0.13405  |
| C | 5.27633  | -1.75957 | -0.77364 |
| C | 0.07045  | 1.61086  | 3.90055  |
| C | 5.56793  | -0.50252 | -0.25342 |
| C | 4.56811  | 0.35433  | 0.20444  |
| C | -1.80774 | 3.24433  | -3.23929 |
| C | -1.30737 | 1.94851  | -3.32771 |
| C | -2.43502 | 3.65594  | -2.06268 |
| H | 0.45950  | -0.03336 | 0.05343  |
| H | -6.30140 | -0.33804 | 0.66688  |
| H | 2.47219  | 0.60530  | 0.51060  |
| H | -0.93253 | -2.72425 | -0.62407 |
| H | -2.33543 | -0.53226 | 2.83391  |
| H | -0.27922 | 2.54274  | 0.65283  |
| H | -5.28381 | -4.27763 | -0.79011 |
| H | 1.00496  | 3.12213  | 2.68157  |
| H | 0.63205  | 1.86682  | 4.79599  |
| H | 1.42740  | -2.83006 | -0.81207 |
| H | 3.70709  | -3.13823 | -1.24157 |
| H | -2.89300 | -3.65563 | -0.91141 |
| H | -1.04269 | 0.06414  | -2.35489 |
| H | 6.08283  | -2.39773 | -1.11532 |
| H | -1.05356 | 0.03956  | 4.85726  |
| H | 4.84100  | 1.32113  | 0.61105  |
| H | -2.83548 | 4.66429  | -1.98296 |
| H | -3.04986 | 3.11090  | -0.08174 |
| H | -1.71525 | 3.92755  | -4.08029 |
| H | -0.82463 | 1.61137  | -4.24254 |
| N | 6.96522  | -0.07039 | -0.17901 |
| O | 7.19102  | 1.04140  | 0.28427  |
| O | 7.82143  | -0.84765 | -0.58556 |

### Compound 1b

|   |          |          |          |
|---|----------|----------|----------|
| N | 11.05646 | 1.13219  | -7.12823 |
| O | 12.26674 | 1.23547  | -6.95792 |
| O | 10.45841 | 0.06944  | -7.24999 |
| O | 6.83385  | 3.40585  | -7.64057 |
| H | 6.56055  | 4.34965  | -7.67271 |
| N | 7.91260  | 5.78104  | -7.38694 |
| C | 8.89993  | 2.27174  | -7.38742 |
| C | 8.79655  | 4.71067  | -7.29310 |
| C | 7.63476  | 9.33886  | -6.83199 |
| C | 6.80803  | 10.53404 | -6.91789 |
| C | 10.18741 | 4.75541  | -7.11154 |
| C | 8.16076  | 3.44972  | -7.44580 |
| C | 8.23305  | 6.98473  | -7.05039 |
| C | 7.30623  | 8.07402  | -7.18767 |
| C | 7.34490  | 11.75784 | -6.48034 |
| C | 10.27132 | 2.36799  | -7.18871 |
| C | 10.93382 | 3.58845  | -7.05483 |
| C | 5.49307  | 10.52684 | -7.42015 |
| C | 6.60079  | 12.93103 | -6.53959 |
| C | 5.30019  | 12.90538 | -7.03993 |
| H | 4.71524  | 13.81994 | -7.08858 |
| C | 4.75087  | 11.69838 | -7.47947 |
| H | 6.32994  | 7.82357  | -7.59545 |
| H | 8.41991  | 1.30739  | -7.49769 |
| H | 5.04948  | 9.59814  | -7.76750 |
| H | 9.22116  | 7.23050  | -6.63767 |
| H | 12.00816 | 3.60206  | -6.91933 |
| H | 8.63657  | 9.50112  | -6.43058 |
| H | 8.36004  | 11.78112 | -6.08967 |
| H | 10.69605 | 5.71197  | -7.03302 |
| H | 7.03591  | 13.86553 | -6.19564 |
| H | 3.73726  | 11.67355 | -7.87075 |

### Compound 2b

|   |          |          |          |
|---|----------|----------|----------|
| N | 11.03825 | 1.09383  | -7.31764 |
| O | 12.25505 | 1.17674  | -7.19322 |
| O | 10.41818 | 0.04399  | -7.42884 |
| O | 6.87580  | 3.58672  | -7.60993 |
| N | 7.92561  | 5.72813  | -7.36815 |
| C | 8.89086  | 2.26591  | -7.48101 |
| C | 8.87095  | 4.69451  | -7.35488 |
| C | 7.66416  | 9.30374  | -6.77750 |
| C | 6.82784  | 10.48370 | -6.66668 |
| C | 10.25777 | 4.74328  | -7.21046 |
| C | 5.34929  | 5.41889  | -6.67011 |
| C | 8.18088  | 3.47005  | -7.49411 |

|   |          |          |           |
|---|----------|----------|-----------|
| C | 8.21249  | 6.97567  | -7.10667  |
| C | 4.14488  | 6.04579  | -7.02400  |
| C | 7.26465  | 8.03536  | -7.06325  |
| C | 5.53426  | 5.10877  | -5.31235  |
| C | 7.44626  | 11.73169 | -6.46401  |
| C | 10.26858 | 2.34591  | -7.33261  |
| C | 6.68274  | 6.36737  | -10.08259 |
| C | 6.13151  | 5.34203  | -9.30382  |
| C | 3.17366  | 6.35843  | -6.07034  |
| C | 10.96801 | 3.55071  | -7.20108  |
| C | 5.19133  | 4.50224  | -9.92833  |
| B | 6.48463  | 5.04451  | -7.75429  |
| C | 4.57328  | 5.41641  | -4.35201  |
| C | 5.42188  | 10.43701 | -6.74851  |
| C | 6.69307  | 12.89462 | -6.35756  |
| C | 3.38716  | 6.04677  | -4.72938  |
| C | 5.30300  | 12.83188 | -6.44668  |
| H | 4.71007  | 13.73867 | -6.36212  |
| C | 4.67252  | 11.59976 | -6.63976  |
| C | 5.37152  | 5.72141  | -12.00580 |
| C | 6.31049  | 6.56185  | -11.41442 |
| C | 4.81271  | 4.68598  | -11.25576 |
| H | 6.22449  | 7.79139  | -7.24907  |
| H | 8.39128  | 1.31106  | -7.58367  |
| H | 4.91449  | 9.48611  | -6.88266  |
| H | 9.25358  | 7.21963  | -6.89190  |
| H | 6.44717  | 4.60486  | -4.99831  |
| H | 3.95787  | 6.28159  | -8.06974  |
| H | 12.04555 | 3.53050  | -7.09924  |
| H | 2.24587  | 6.83664  | -6.37771  |
| H | 2.63298  | 6.28583  | -3.98314  |
| H | 8.72990  | 9.47454  | -6.61483  |
| H | 8.53086  | 11.78114 | -6.39455  |
| H | 10.79033 | 5.68518  | -7.11648  |
| H | 7.42907  | 7.03540  | -9.65635  |
| H | 7.18878  | 13.84924 | -6.20397  |
| H | 4.74522  | 5.16040  | -3.30874  |
| H | 3.58896  | 11.54809 | -6.70176  |
| H | 4.08272  | 4.01827  | -11.70822 |
| H | 4.75201  | 3.68504  | -9.36006  |
| H | 5.08045  | 5.86685  | -13.04348 |
| H | 6.76107  | 7.36740  | -11.99036 |

### Compound 1c

|   |          |         |          |
|---|----------|---------|----------|
| N | 11.11671 | 1.16780 | -7.10341 |
| O | 12.33531 | 1.29703 | -7.03216 |
| O | 10.53341 | 0.08911 | -7.12313 |
| O | 6.82259  | 3.34778 | -7.41287 |
| H | 6.53900  | 4.28804 | -7.47465 |

|   |          |          |          |
|---|----------|----------|----------|
| N | 7.86976  | 5.74295  | -7.36369 |
| C | 8.92399  | 2.25645  | -7.25773 |
| C | 8.77943  | 4.69581  | -7.27930 |
| C | 7.59082  | 9.32066  | -6.90180 |
| C | 6.77111  | 10.50689 | -6.98188 |
| C | 10.17886 | 4.77122  | -7.20680 |
| C | 8.16080  | 3.41680  | -7.32017 |
| C | 8.18728  | 6.96487  | -7.08136 |
| C | 7.25192  | 8.03995  | -7.20844 |
| C | 7.31306  | 11.75099 | -6.60707 |
| C | 10.30621 | 2.38353  | -7.16743 |
| C | 10.95063 | 3.62019  | -7.14663 |
| C | 5.43211  | 10.50777 | -7.42251 |
| C | 6.58172  | 12.92303 | -6.66194 |
| C | 5.23789  | 12.91677 | -7.10475 |
| C | 4.68555  | 11.66722 | -7.48492 |
| H | 6.25937  | 7.77668  | -7.56609 |
| H | 8.45627  | 1.28016  | -7.28232 |
| H | 4.96292  | 9.57577  | -7.72567 |
| H | 9.19098  | 7.23049  | -6.72043 |
| H | 12.03168 | 3.65864  | -7.09415 |
| H | 8.61023  | 9.49054  | -6.54932 |
| H | 8.34433  | 11.79412 | -6.26202 |
| H | 10.67237 | 5.73890  | -7.21860 |
| N | 4.49899  | 14.06999 | -7.16467 |
| H | 7.05576  | 13.85035 | -6.36116 |
| H | 3.66008  | 11.60778 | -7.83156 |
| H | 5.95455  | 15.59217 | -7.39604 |
| C | 3.13166  | 14.03576 | -7.64072 |
| C | 5.09082  | 15.33066 | -6.76855 |
| H | 4.34906  | 16.12414 | -6.87098 |
| H | 5.42180  | 15.31202 | -5.72104 |
| H | 2.72086  | 15.04636 | -7.62487 |
| H | 3.06850  | 13.66248 | -8.67225 |
| H | 2.49484  | 13.40317 | -7.00695 |

### Compound 2c

|   |          |          |          |
|---|----------|----------|----------|
| N | 11.11856 | 1.20391  | -7.03844 |
| O | 12.33490 | 1.31390  | -6.92180 |
| O | 10.51785 | 0.13673  | -7.07598 |
| O | 6.91073  | 3.59998  | -7.48498 |
| N | 7.92495  | 5.76780  | -7.39747 |
| C | 8.94956  | 2.32462  | -7.27518 |
| C | 8.88809  | 4.75500  | -7.31564 |
| C | 7.62371  | 9.37959  | -7.04500 |
| C | 6.78440  | 10.54378 | -7.00648 |
| C | 10.27361 | 4.83602  | -7.18167 |
| C | 5.36134  | 5.46591  | -6.65688 |
| C | 8.22004  | 3.51115  | -7.36767 |

|   |          |          |           |
|---|----------|----------|-----------|
| C | 8.19320  | 7.03906  | -7.22044  |
| C | 4.15750  | 6.08054  | -7.03390  |
| C | 7.23998  | 8.08289  | -7.25008  |
| C | 5.54878  | 5.21739  | -5.28702  |
| C | 7.36726  | 11.81891 | -6.85377  |
| C | 10.32868 | 2.43621  | -7.13775  |
| C | 6.68210  | 6.16988  | -10.15303 |
| C | 6.11720  | 5.22529  | -9.28635  |
| C | 3.19047  | 6.43987  | -6.09263  |
| C | 11.00560 | 3.65843  | -7.09266  |
| C | 5.14934  | 4.36162  | -9.83084  |
| B | 6.49687  | 5.03966  | -7.72473  |
| C | 4.59236  | 5.57194  | -4.33819  |
| C | 5.37603  | 10.49421 | -7.10677  |
| C | 6.61237  | 12.97393 | -6.81434  |
| C | 3.40692  | 6.18859  | -4.73953  |
| C | 5.20065  | 12.91871 | -6.92344  |
| C | 4.60693  | 11.63684 | -7.06654  |
| C | 5.33270  | 5.40067  | -12.00366 |
| C | 6.29820  | 6.26351  | -11.49255 |
| C | 4.75884  | 4.44438  | -11.16502 |
| H | 6.20255  | 7.81820  | -7.42106  |
| H | 8.46593  | 1.35676  | -7.30958  |
| H | 4.87350  | 9.53596  | -7.20279  |
| H | 9.23155  | 7.30779  | -7.02128  |
| H | 6.46123  | 4.72483  | -4.95459  |
| H | 3.96789  | 6.27013  | -8.08869  |
| H | 12.08361 | 3.66502  | -6.99376  |
| H | 2.26289  | 6.90653  | -6.41860  |
| H | 2.65565  | 6.46333  | -4.00245  |
| H | 8.68846  | 9.56882  | -6.89323  |
| H | 8.44925  | 11.89728 | -6.76779  |
| H | 10.79010 | 5.79116  | -7.15523  |
| N | 4.43795  | 14.05321 | -6.88884  |
| H | 7.44853  | 6.85180  | -9.78927  |
| H | 7.11656  | 13.92626 | -6.69791  |
| H | 4.76720  | 5.36273  | -3.28489  |
| H | 3.52994  | 11.54075 | -7.14067  |
| H | 4.00822  | 3.75933  | -11.55367 |
| H | 4.69786  | 3.60471  | -9.19260  |
| H | 5.03280  | 5.46735  | -13.04701 |
| H | 6.76062  | 7.00802  | -12.13745 |
| H | 5.76102  | 15.56883 | -7.54753  |
| C | 2.99480  | 13.96726 | -7.00030  |
| C | 5.06768  | 15.34814 | -6.72468  |
| H | 4.29963  | 16.12259 | -6.71628  |
| H | 5.62306  | 15.41258 | -5.77911  |
| H | 2.57242  | 14.97242 | -6.96716  |
| H | 2.68915  | 13.50398 | -7.94780  |
| H | 2.55604  | 13.38854 | -6.17614  |
